# Supplementary material for: Argatroban in Patients With Acute Ischemic Stroke With Early Neurological Deterioration: A Randomized Clinical Trial
Source: PubMed Central journal article supplement (PMC10775075; doi:10.1001/jamaneurol.2023.5093), 2024-01-08
Supplement: jamaneurol-e235093-s002.pdf [file jamaneurol-e235093-s002.pdf]

1  
2  
3  
4  
5  
6  
7  
8  
9  
10  
11  
12  
13  
14  
15  
16  
17  
18  
19  
20  
21  
22  
23  
24  
25  
26

**Efficacy of Argatroban in acute ischemic Stroke with Early neurological deterioration (EASE): a prospective, randomised, open-label, blinded-end point, multi-centre trial**

**Statistical analysis plan**

ClinicalTrials.gov registration number: NCT04275180

Protocol version and date: Version 1.0, 09/27/2019

27

28

Chief Investigator: Prof Min Lou

29

30

Trial statistician: Changzheng Yuan

31

32

SAP authors: Xuting Zhang, Wansi Zhong, Min Lou

33

34

35

| <b>SAP version history</b> |                     |                           |
|----------------------------|---------------------|---------------------------|
| <b>Version Date</b>        | <b>SAP Version#</b> | <b>Details of Changes</b> |
| 09/27/2019                 | 1.0                 | First version             |

36

37

38

39

40

41  
42  
43  
44  
45  
46  
47  
48  
49  
50  
51  
52  
53  
54  
55  
56  
57  
58  
59  
60  
61  
62  
63  
64  
65  
66  
67  
68  
69  
70  
71  
72  
73  
74  
75  
76  
77  
78  
79  
80  
81  
82  
83  
84

## Table of contents

|                                                                        |    |
|------------------------------------------------------------------------|----|
| 1. Introduction .....                                                  | 5  |
| 1.1 Purpose of the statistical analysis plan .....                     | 5  |
| 1.2 Background to the study .....                                      | 5  |
| 2. Study objectives and outcomes .....                                 | 5  |
| 2.1 Study objectives .....                                             | 5  |
| 2.1.1 Primary Objective .....                                          | 5  |
| 2.1.2 Secondary Objectives .....                                       | 5  |
| 2.2 Outcomes .....                                                     | 6  |
| 2.2.1 Primary outcome .....                                            | 6  |
| 2.2.2 Secondary outcomes .....                                         | 6  |
| 3. Study design .....                                                  | 6  |
| 3.1 Design .....                                                       | 6  |
| 3.2 Trial sites .....                                                  | 6  |
| 3.3 Treatments .....                                                   | 7  |
| 3.4 Randomisation .....                                                | 7  |
| 3.5 Sample size .....                                                  | 7  |
| 4. Analysis populations .....                                          | 7  |
| 4.1 Study population data sets .....                                   | 7  |
| 4.2 Analysis close date .....                                          | 8  |
| 4.3 Data cleaning .....                                                | 8  |
| 4.4 Data download .....                                                | 8  |
| 5. Statistical analyses .....                                          | 8  |
| 5.1 Primary outcome analysis .....                                     | 8  |
| 5.1.1 mTT analysis of the primary outcome - the primary analysis ..... | 8  |
| 5.1.2 PP analysis of the primary outcome .....                         | 9  |
| 5.1.3 Covariate adjusted analysis of the primary outcome .....         | 9  |
| 5.1.4 Subgroup analysis of the primary outcome .....                   | 9  |
| 5.2 Secondary outcome analysis .....                                   | 9  |
| 5.3 Exploratory analysis .....                                         | 9  |
| 6. Safety analyses .....                                               | 9  |
| 6.1 Safety variables .....                                             | 9  |
| 7. General considerations for data analyses .....                      | 10 |
| 7.1 Covariates analyses .....                                          | 10 |
| 7.2 Subgroup analysis .....                                            | 10 |
| 7.3 Multiplicity .....                                                 | 10 |
| 7.4 Missing data .....                                                 | 10 |
| 7.5 Further exploratory analyses .....                                 | 10 |
| 7.6 Data summaries .....                                               | 10 |
| 8. References .....                                                    | 11 |

85 **Abbreviation**

| Abbreviation | Full title                                    |
|--------------|-----------------------------------------------|
| AE           | Adverse Event                                 |
| AIS          | Acute Ischemic Stroke                         |
| ALT          | Alanine Aminotransferase                      |
| AST          | Aspartate Transaminase                        |
| APTT         | Activated Partial Thromboplastin Time         |
| BUN          | Blood Urea Nitrogen                           |
| Cr           | Creatinine                                    |
| CRF          | Clinical Research Form                        |
| CT           | Computed Tomography                           |
| GCP          | Good Clinical Practice                        |
| GLU          | Glucose                                       |
| IQR          | Inter-Quartile Range                          |
| ITT          | Intention to Treat                            |
| MRI          | Magnetic Resonance Imaging                    |
| mRS          | Modified Rankin Scale                         |
| NIHSS        | National Institute of Health Stroke Scale     |
| PPS          | Per Protocol Set                              |
| PT           | Prothrombin Time                              |
| rtPA         | Recombinant tissue-type plasminogen activator |
| SAE          | Serious Adverse Event                         |
| SD           | Standard Deviation                            |
| SS           | Safety Set                                    |
| TC           | Total Cholesterol                             |
| TG           | Triglyceride                                  |
| TOAST        | Trial of Org 10 172 in acute stroke treatment |

86

87 **1. Introduction**

88 **1.1 Purpose of the statistical analysis plan**

89 In this statistical analysis plan (SAP), we delineate the outcome variables, statistical methods, and  
90 analysis strategies in order to make comparison between the argatroban with guideline-based  
91 treatment in acute ischemic stroke with early neurological deterioration.

92

93 **1.2 Background to the study**

94 Currently, most patients with acute ischemic stroke, whether they receive intravenous recombinant  
95 tissue plasminogen activator or not, are admitted to acute stroke units for prevention and  
96 monitoring of early complications. While a sizeable proportion of patients exhibit signs of  
97 improvement in this early post-stroke period, another significant proportion shows no  
98 improvement, or even worse experience deterioration in the severity of the neurological deficit,  
99 so-called early neurological deterioration. Early neurological deterioration (END) results in poor  
100 outcome in stroke, despite the use of antiplatelet and thrombolytic therapies<sup>1</sup>. How to improve the  
101 neurological function of END patients has been brought to the fore by data as the rapid rise of  
102 neuroprotective agents in animal experiments. By now, no acknowledged treatment was  
103 recommended by the guidelines.

104

105 Therefore, it is necessary to explore an effective way to achieve improvement in acute ischemic  
106 stroke patients with END. Argatroban is a selective thrombin inhibitor which can directly inhibit  
107 free and clot-associated thrombin and thrombin-induced activities. Clinical studies have shown  
108 that argatroban is safe and may offer benefits in patients with AIS. There is growing evidence  
109 from research which demonstrated the promise of argatroban therapy in improving the prognosis  
110 after stroke.

111

112 Herein, this study aims to investigate the safety and efficacy of argatroban in improving the  
113 functional outcome without increasing the risk of intracerebral haemorrhage in END patients.

114

115 **2. Study objectives and outcomes**

116 **2.1 Study objectives**

117 **2.1.1 Primary Objective**

118 To test the hypothesis that the argatroban plus standard therapy will be superior to standard  
119 therapy alone in improving good functional outcomes in AIS patients with END.

120 **2.1.2 Secondary Objectives**

121 1. To determine the proportion of favourable functional outcome at 90 days by treatment  
122 group.

123 2. To determine the distribution of mRS at 90 days by treatment group;

124 3. To determine National Institutes of Health stroke scale (NIHSS) score at 7 days and 90±3  
125 days after randomisation by treatment group;

126 4. To determine the rate of composite cardiovascular events at 90±3 days, including  
127 cerebrovascular events, myocardial infarction, angina pectoris and systemic embolism by  
128 treatment group.

129 5. To determine the Barthel scale score at 90±3 days.

130

131 **2.2 Outcomes**

132 **2.2.1 Primary outcome**

133 The primary outcome is the occurrence of mRS (0-3) at 90 days (binary outcome), characterized  
134 by a score of 0-3 on the mRS for assessment of neurological disability at 90 days after  
135 randomisation through telephone.

136

137 **2.2.2 Secondary outcomes**

138 1) The proportion of favourable functional outcome at 90 days by treatment group.

139 2) Recovery assessed by categorical shift in mRS at 90 days;

140 3) National Institutes of Health stroke scale (NIHSS) score at 7 days and 90±3 days after  
141 randomisation;

142 4) The rate of composite cardiovascular events at 90±3 days, including cerebrovascular events,  
143 myocardial infarction, angina pectoris and systemic embolism.

144 5) Barthel scale score at 90±3 days.

145

146 **3. Study design**

147 **3.1 Design**

148 This is a prospective, randomised, open-label, blinded-endpoint, multicentre trial.

149 **3.2 Trial sites**

150 Twenty-eight hospitals will participate this clinical trial. Based on previous good cooperation on  
151 clinical trials of acute ischemic stroke, these trial sites were selected to reveal a spectrum of China  
152 health care institutions.

153

154 Department of Neurology, the 2nd Affiliated Hospital of Zhejiang University, Hangzhou, China

155 Department of Neurology, The Second Affiliated Hospital of Jiaying University, Jiaying, China

156 Department of Neurology, Haiyan People's Hospital, Jiaying, China

157 Department of Neurology, First hospital of Ninghai county, Ningbo, China

158 Department of Neurology, People's hospital of Anji, Huzhou, China

159 Department of Neurology, Yiwu Central Hospital, Yiwu, China

160 Department of Neurology, The Affiliated People's Hospital of Ningbo University, Ningbo, China

161 Department of Neurology, Putuo Hospital, Zhoushan, China

162 Department of Neurology, Dongyang Affiliated Hospital of Wenzhou Medical University,  
163 Dongyang, China

164 Department of Neurology, Zhuji People's Hospital, Zhuji, China

165 Department of Neurology, Quzhou traditional Chinese medicine hospital, Quzhou, China

166 Department of Neurology, Xiangshan People's Hospital, Xiangshan, China

167 Department of Neurology, Institute of Geriatric Neurology, The Second Affiliated Hospital and  
168 Yuying Children's Hospital, Wenzhou Medical University, Wenzhou, China

169 Department of Neurology, Shaoxing Second Hospital, Shaoxing, China

170 Department of Neurology, The Affiliated Hospital of Hangzhou Normal University, Hangzhou,  
171 China

172 Department of Neurology, The Second People's Hospital of Yuhang District, Hangzhou, China

173 Department of Neurology, The affiliated hospital of Medicine School, Ningbo University, Ningbo,  
174 China

175 Department of Neurology, Ningbo Ninth Hospital, Ningbo, China  
176 Department of Neurology, Ningbo Medical Center Lihuili Hospital, Ningbo, China  
177 Department of Neurology, Quzhou City kecheng district people's hospital, Quzhou, China  
178 Department of Neurology, Zhoushan Hospital, Wenzhou Medical University, Zhoushan, China  
179 Department of Neurology, Affiliated Hospital of Jiaxing University, Jiaxing, China  
180 Department of Neurology, Tongxiang Hospital of Traditional Chinese Medicine, Jiaxing, China  
181 Department of Neurology, Zhenhai Longsai hospital of Ningbo city, Ningbo, China  
182 Department of Neurology, Zhejiang University, Hangzhou, China  
183 Department of Neurology, The 4th affiliated hospital of Zhejiang University, School of Medicine,  
184 Yiwu, China  
185 Department of Neurology, Ningbo No.2 Hospital, Ningbo, China  
186 Department of Neurology, Ningbo Hangzhou Hospital, Hangzhou, China

187  
188 **3.3 Treatments**

189 Experimental group: intravenous argatroban (Argatroban treatment was as follows:  
190 continuous infusion with a dose of 60 mg/d for 2 days after randomisation, followed by 20mg per  
191 day for 5 days).

192 Control group: standard therapy according to Chinese guidelines for diagnosis and treatment  
193 of acute ischemic stroke 2018.

194 Both groups of patients were given standard guideline-based treatment until to 90 days.

195  
196 **3.4 Randomisation**

197 Patients are randomly assigned to either treatment or control arms using a secure, web-based  
198 randomization system. The randomization scheme is the combination of minimization and the  
199 biased coin method and is never deterministic. A dynamic stratification system will ensure  
200 well-balanced subgroups. The randomization algorithm will employ biased-coin minimization and  
201 the variance method with stratification weights. The strategy is to balance treatment assignment  
202 along the marginal distribution of each stratification factor. The stratification factors used and their  
203 hierarchy will be: 1) age, 2) sex, and 3) NIHSS at randomization.

204  
205 **3.5 Sample size**

206 The sample size was estimated according to the results of the previous observational cohort (with  
207 the same inclusion and exclusion criteria as the RCT) at the study center, 33 patients in the  
208 experimental group and 66 patients in the control group. There were no significant differences in  
209 age and NIHSS score (baseline and progressive time), and the proportion of mRS 0-3 at Day 90 in  
210 the experimental group and the control group was 80% and 69.6% , respectively. Based on 0.8  
211 power to detect a significant difference ( $p=0.05$ , two-sided), and to compensate for non-evaluable  
212 patients of 15%, a total sample size of up to 628 patients would be required with about 314 in each  
213 of treatment and placebo arms.

214  
215 **4. Analysis populations**

216 **4.1 Study population data sets**

217 Before the database lock, each analysis set and the reasons for exclusion will be determined and  
218 documented. When the subjects have protocol deviation/violation, the reason will be listed in a

219 summary table. Two study populations will be studied in the analysis to determine efficacy and  
220 safety, as follows:

221 (1) Intention-To-Treat (ITT)

222 The ITT population includes all subjects who were randomly assigned to a treatment group on an  
223 intention-to-treat basis, including subjects who planned to receive treatment but did not actually  
224 receive it.

225 (2) Per Protocol Set (PPS)

226 The PPS population include completion of all treatments or at least the determination of the  
227 primary end point as required by the research protocol, and good compliance (the ratio of the  
228 actual dose to the applied dose is between 80% and 120%). Subjects with no serious protocol  
229 violation (the definition of serious protocol violation will be specified in the Statistical Analysis  
230 Plan) constitute the PPS analysis set for this study.

231 (3) Safety Set (SS)

232 The SS analysis population included all subjects who received at least one study protocol  
233 treatment and had at least one safety evaluation.

234

235 **4.2 Analysis close date**

236 The analysis close date is defined as the date on which the last participant completed 90-day  
237 follow-up.

238 Last contact date, which is also shown as Trial reference end date, is the date on which the trial  
239 procedure last related. For survival subjects it is defined as the maximum of:

240 Date of last office visit (scheduled or unscheduled visit)

241 Date of the last follow-up contact (including last date on subject survival status recorded)

242 Date of the last known adverse event (AE) status or lab results reported on the AE or lab case  
243 report form (CRF) pages, respectively.

244

245 **4.3 Data cleaning**

246 Missing data will be properly coded. Researchers will review the data to ensure there are no  
247 erroneous entries.

248

249 **4.4 Data download**

250 The database will be locked when all data have been loaded and reviewed. The data will be  
251 downloaded into SPSS formats for statistical analyses.

252

253 **5. Statistical analyses**

254 The analyses will be performed by the trial statistician and the primary analysis will be checked by  
255 a second statistician. This study adopt the ITT analyses as the main strategy analysis for the  
256 Primary and secondary outcomes.

257 **5.1 Primary outcome analysis**

258 **5.1.1 ITT analysis of the primary outcome - the primary analysis**

259 The primary outcome is good functional outcome defined as mRS (0-3) at 90 days, which is a  
260 binary outcome. The primary endpoint will be based on the ITT population as described above.

261 The primary endpoint will be summarized by number (%) of participants that have good  
262 functional outcome by treatment group. A generalized linear models will be performed, in which



263 the occurrence of good functional outcome at 90 days is the response variable and the treatment is  
264 the only predictor. This model will derive relative risk (RR) and risk difference (RD) of achieving  
265 the primary outcome between the Argatroban group and Control group with p value and  
266 two-sided 95% confidence interval (CI).

### 267 **5.1.2 PP analysis of the primary outcome**

268 We will also carry out an analysis of the primary outcome on the PP population, using the same  
269 statistical methods in Section 5.1.1.

### 270 **5.1.3 Covariate adjusted analysis of the primary outcome**

271 In order to make sure whether the treatment effect is affected with the inclusion of covariables, we  
272 will also perform the adjusted analyses including following covariables:

273 Age, Sex, NIHSS score at randomization, Time from the onset of symptoms to randomization

274 This model derive the adjusted odds ratio (OR) and 95% CI comparing the Argatroban group and  
275 Control group.

276 Missing covariates on baseline will be imputed as the following description in 8.5 missing data.

277

### 278 **5.1.4 Subgroup analysis of the primary outcome**

279 These followed covariates by age (<65 years or ≥years), sex (female or male), NIHSS (≤8 or >8),  
280 time from onset to treatment (≤24hours or >24hours), and whether receiving reperfusion therapy  
281 will be included in subgroup analyses by carrying out the above analysis separately for each  
282 category of a subgroup covariate.

283

284 Homogeneity of treatment effect by a subgroup variable was evaluated through a binary logistic  
285 regression, in which the treatment, subgroup variable and their interaction term are predictors. P  
286 value will be displayed for the interaction term.

287

## 288 **5.2 Secondary outcome analysis**

289 Secondary outcome analyses will be based on the ITT and PP populations.

290 Proportion of mRS (0-2) at 90 days and the occurrence of stroke or other vascular events within  
291 90d will be treated as a binary outcome and will be calculated by number (%) of participants with  
292 event by treatment group and analysed by the same analysis as the primary endpoint. This model  
293 derive the adjusted RR, RD and 95% CI comparing the Argatroban group and Control group.

294

## 295 **5.3 Exploratory analysis**

296 If necessary, we will use other statistical methods which is defined as exploratory.

297

## 298 **6. Safety analyses**

### 299 **6.1 Safety variables**

300 Adverse events (AEs) will be restricted to those events happened within the 90 days after  
301 randomization. Adverse events was described as the number of AEs, the number (%) of  
302 participants with AEs by the Argatroban group.

303

304 Safety analyses will focus on the number of any adverse medical events and serious adverse  
305 events (SAEs) occurring after randomisation.

306 Summaries of the total number of reported AEs/SAEs and number of participants reporting at least

307 one AE/SAE will be presented by treatment received and overall. Moreover, summaries of the  
308 suspected relationship with trial treatment, suspected trial treatment or other cause, duration of  
309 recovered SAEs, seriousness criteria, event outcome, DAIDS grade and SAE, will be presented by  
310 treatment received and overall.

311

312 Line listings of all reported SAEs for each participant will also be presented by treatment received.

313 They will include (where appropriate):

314 Randomised treatment

315 DAIDS grade

316 Event description

317 Seriousness criteria

318 Suspected relationship to the trial medications

319 Suspected products

320 Other causality

321 Expectedness

322 Date of randomisation

323 Date of onset

324 Date event became serious (serious events only)

325 Date of recovery

326 Outcome

327 Details of the treatment received

328

## 329 **7. General considerations for data analyses**

330 All data analyses will be done by SPSS (version 23).

### 331 **7.1 Covariates analyses**

332 Covariate analyses will be performed on the primary outcome and secondary outcomes on the ITT  
333 and PP populations.

### 334 **7.2 Subgroup analysis**

335 Subgroup analyses will be performed for the primary outcome on the ITT and PP populations.  
336 Homogeneity of treatment effect by a subgroup variable was evaluated through a binary logistic  
337 regression, in which the treatment, subgroup variable and their interaction term are predictors. P  
338 value will be displayed for the interaction term.

### 339 **7.3 Multiplicity**

340 Secondary outcomes and additional analyses for the primary outcome are exploratory in nature,  
341 thus, we will not apply multiplicity adjustment.

### 342 **7.4 Missing data**

343 Simple imputation methods will be used in the covariate adjusted analysis for missing baseline  
344 covariates. If it is a continuous variable, missing values will be imputed with average number  
345 calculated from the available sample. If missing variable is categorical, we will impute it using the  
346 most frequent value from the sample.

### 347 **7.5 Further exploratory analyses**

348 If deemed to be needed, exploratory analyses will be added to this analysis plan with reasonable  
349 explanation.

### 350 **7.6 Data summaries**

351 Continuous variables will be summarised according to number of subjects with non-missing data  
352 (n), mean, standard deviation (SD), median, minimum, and maximum.

353 Categorical variables will be summarised according to the absolute frequency and percentage of  
354 participants (%) in each category level. The denominator for the percentages is the number of  
355 subjects in the treatment arm with data available.

356

## 357 **8. References**

358 1) Park MG, Oh EH, Kim BK, Park KP. Intravenous tissue plasminogen activator in acute branch  
359 atheromatous disease: does it prevent early neurological deterioration? *J Clin Neurosci.*  
360 2016;33:194–197. doi: 10.1016/j.jocn.
