# Supplementary material for: Argatroban in Patients With Acute Ischemic Stroke With Early Neurological Deterioration: A Randomized Clinical Trial
Source: PubMed Central journal article supplement (PMC10775075; doi:10.1001/jamaneurol.2023.5093), 2024-01-08
Supplement: jamaneurol-e235093-s003.pdf [file jamaneurol-e235093-s003.pdf]

## Supplementary Online Content

Zhang X, Zhong W, Xue R, et al. Argatroban in patients with acute ischemic stroke with early neurological deterioration: a randomized clinical trial. *JAMA Neurol*. Published online January 8, 2024. doi:10.1001/jamaneurol.2023.5093

**eTable 1.** Baseline Patient Characteristics in the Per-Protocol Set Population

**eTable 2.** Primary Analysis of Outcomes in the Per-Protocol Set

**eTable 3.** Primary Outcome by Subgroups in the Full Analysis Set

This supplementary material has been provided by the authors to give readers additional information about their work.

**eTable 1 Baseline patient characteristics in the per- protocol set population**

| Characteristic                                            | No.(%)                                    |                    |
|-----------------------------------------------------------|-------------------------------------------|--------------------|
|                                                           | Per protocol set<br>Argatroban<br>(n=292) | Control<br>(n=272) |
| Age, median (IQR), y                                      | 66 (57,74)                                | 66 (56,74)         |
| Men                                                       | 185 (63.4)                                | 173 (63.6)         |
| Currently smokes tobacco                                  | 99 (33.9)                                 | 73 (26.8)          |
| Comorbidities                                             |                                           |                    |
| Hypertension                                              | 212 (72.6)                                | 182 (66.9)         |
| Diabetes                                                  | 82 (28.1)                                 | 77 (28.3)          |
| Prior ischemic or hemorrhagic stroke                      | 37 (12.7)                                 | 31 (11.4)          |
| Hyperlipidemia                                            | 33 (10.9)                                 | 28 (10.3)          |
| Coronary heart disease                                    | 4 (1.4)                                   | 7 (2.6)            |
| Body mass index, median (IQR)                             | 23.4 (21.0, 25.2)                         | 24.1 (22.0, 26.1)  |
| Blood pressure at randomization                           |                                           |                    |
| Systolic                                                  |                                           |                    |
| Median (IQR), mmHg                                        | 150 (140,167)                             | 150 (136, 168)     |
| >140mmHg                                                  |                                           |                    |
| Diastolic                                                 |                                           |                    |
| Median (IQR), mmHg                                        | 84 (76,92)                                | 84 (77, 94)        |
| >90mmHg                                                   |                                           |                    |
| Estimated premorbid function (mRS score)                  |                                           |                    |
| No symptoms (score of 0)                                  | 275 (94.2)                                | 258 (94.6)         |
| Symptoms without any disability (score of 1)              | 17 (5.8)                                  | 14 (5.1)           |
| NIHSS score at randomization, median (IQR)                | 8 (6,10)                                  | 8 (5,10)           |
| NIHSS score before deterioration, median (IQR)            | 4 (2, 6)                                  | 3 (2, 6)           |
| Time from symptom onset to randomization, median (IQR), h | 24 (15,34)                                | 23 (12,31)         |
| Antiplatelet therapy throughout procedure                 |                                           |                    |
| Monotherapy                                               | 230 (78.8)                                | 184 (67.6)         |
| Dual antiplatelet therapy                                 | 62 (21.2)                                 | 88 (32.4)          |
| Reperfusion treatment                                     | 53 (18.2)                                 | 58 (21.3)          |
| Intravenous thrombolysis treatment                        | 51 (17.5)                                 | 56 (20.6)          |
| Endovascular treatment                                    | 3 (1.0)                                   | 4 (1.5)            |

**eTable 2 . Primary Analysis of Outcomes in the per-protocol Set**

| Outcome                                       | No.(%)                |                    | Unadjusted                   |                        |              | Adjusted <sup>a</sup>          |                        |              |  |
|-----------------------------------------------|-----------------------|--------------------|------------------------------|------------------------|--------------|--------------------------------|------------------------|--------------|--|
|                                               | Argatroban<br>(n=292) | Control<br>(n=272) | Risk difference (95%<br>CI)  | Risk ratio (95%<br>CI) | P<br>value   | Risk<br>difference<br>(95% CI) | Risk ratio (95%<br>CI) | P<br>value   |  |
| <b>Primary</b>                                |                       |                    |                              |                        |              |                                |                        |              |  |
| mRS score of 0 to 3 at 90d <sup>b,c</sup>     | 236/292(80.8%)        | 200/272(73.5%)     | 7.3% (0.4% to 14.2%)         | 1.099 (1.005 to 1.203) | <b>0.038</b> | 7.1% (0.1% to 14.0%)           | 1.096 (1.001 to 1.201) | <b>0.048</b> |  |
| <b>Secondary</b>                              |                       |                    |                              |                        |              |                                |                        |              |  |
| mRS score of 0 to 2 at 90d                    | 163/292(55.8%)        | 138/272(50.7%)     | 5.1% (-3.2% to 13.3%)        | 1.100 (0.942 to 1.285) | 0.228        | 4.3% (-3.9% to 12.5%)          | 1.087 (0.929 to 1.272) | 0.299        |  |
| NIHSS score at 90d, median (IQR) <sup>d</sup> | 2 (0, 4)              | 2 (0, 4)           | MD: -0.982 (-2.881 to 0.917) |                        | 0.311        | AMD: -1.058 (-2.958 to 0.841)  |                        | 0.275        |  |
| Barthel scale score at 90d, median (IQR)      | 90 (70,100)           | 90 (55,100)        | MD: 4.961 (-0.351 to 10.272) |                        | <b>0.068</b> | AMD: 4.615 (-0.618 to 9.849)   |                        | <b>0.084</b> |  |
| mRS score distribution at 90d <sup>e</sup>    | 2 (1-3)               | 2 (1-4)            | OR: 0.707 (0.528 to 0.947)   |                        | <b>0.020</b> | OR: 0.723 (0.538 to 0.971)     |                        | <b>0.031</b> |  |
| Stroke or other vascular events within 90d    | 17/292(5.8%)          | 18/272(6.6%)       | -0.8% (-4.8% to 3.2%)        | 0.879 (0.459 to 1.680) | <b>0.696</b> | -0.7% (-4.7% to 3.4%)          | 0.902 (0.465 to 1.743) | <b>0.757</b> |  |

Abbreviations: mRS, modified Rankin Scale; NIHSS, National Institutes of Health Stroke Scale; MD, mean difference; AMD adjusted mean difference

a Adjusted for prespecified prognostic variables (age, sex, NIHSS score at randomization, time from the onset of symptoms to randomization)

b mRS scores range from 0 to 6; a score of 0 indicates no symptoms; 1, symptoms without clinical significant disability; 2, slight disability; 3, moderate disability; 4,

moderately severe disability; 5, severe disability; and 6, death.

c calculated using a generalized linear model

d NIHSS scores range from 0 to 42, with higher scores indicating greater stroke severity. It is analyzed using a generalized linear model.

e as a post hoc analysis, this outcome was used to describe a shift in measures of functioning according to the full range of scores on the mRS at 90 days.

eTable 3 Primary Outcome by Subgroups in the Full Analysis Set

| Subgroups                                                                   | Patients No. | Argatroban group | Control group  | Adjusted Risk Ratio (95% CI) | P value | Interaction p value |
|-----------------------------------------------------------------------------|--------------|------------------|----------------|------------------------------|---------|---------------------|
| <b>Age (years)</b>                                                          |              |                  |                |                              |         |                     |
| < 65                                                                        | 282          | 122/143 (85.3)   | 110/139 (79.1) | 1.068 (0.955 to 1.194)       | 0.248   | 0.747               |
| ≥65                                                                         | 319          | 118/155 (76.1)   | 112/164 (68.3) | 1.110 (0.965 to 1.278)       | 0.144   |                     |
| <b>Sex</b>                                                                  |              |                  |                |                              |         |                     |
| Female                                                                      | 219          | 89/109 (81.7)    | 72/110 (65.5)  | 1.235 (1.049 to 1.455)       | 0.012   | <b>0.046</b>        |
| Male                                                                        | 382          | 151/189 (79.9)   | 150/193 (77.7) | 1.023 (0.920 to 1.138)       | 0.671   |                     |
| <b>NIHSS score at randomization</b>                                         |              |                  |                |                              |         |                     |
| ≤8                                                                          | 360          | 143/178 (80.3)   | 139/182 (76.4) | 1.046 (0.936 to 1.169)       | 0.430   | 0.104               |
| >8                                                                          | 241          | 97/120 (80.8)    | 83/121 (68.6)  | 1.170 (1.004 to 1.385)       | 0.045   |                     |
| <b>Reperfusion therapy</b>                                                  |              |                  |                |                              |         |                     |
| Yes                                                                         | 118          | 40/54 (74.1)     | 46/64 (71.9)   | 1.005 (0.793 to 1.274)       | 0.964   | 0.384               |
| No                                                                          | 483          | 200/244 (82.0)   | 176/239(73.6)  | 1.115 (1.012 to 1.229)       | 0.029   |                     |
| <b>Time from the onset of index event symptoms to randomization (hours)</b> |              |                  |                |                              |         |                     |
| ≤24                                                                         | 328          | 128/161 (79.5)   | 130/167 (77.8) | 1.025 (0.913 to 1.151)       | 0.677   | 0.112               |
| >24                                                                         | 273          | 112/137 (81.8)   | 92/136 (67.6)  | 1.188 (1.031 to 1.369)       | 0.018   |                     |
| <b>DAPT</b>                                                                 |              |                  |                |                              |         |                     |
| Yes                                                                         | 167          | 53/63 (84.1)     | 74/104 (71.2)  | 1.169 (0.978-1.394)          | 0.087   | 0.412               |
| No                                                                          | 434          | 187/235 (79.6)   | 148/199 (74.4) | 1.072 (0.967-1.190)          | 0.188   |                     |
| <b>TOAST</b>                                                                |              |                  |                |                              |         |                     |
| LAA                                                                         | 268          | 101/132 (76.5)   | 98/136 (72.1)  | 1.065 (0.923-1.228)          | 0.389   | 0.662               |
| SVO                                                                         | 241          | 101/121 (84.3)   | 90/120 (75.0)  | 1.128 (0.980-1.026)          | 0.071   |                     |

---

|                  |    |              |              |                     |       |
|------------------|----|--------------|--------------|---------------------|-------|
| Other etiologies | 69 | 31/38 (81.6) | 24/31 (77.4) | 1.026 (0.792-1.334) | 0.845 |
|------------------|----|--------------|--------------|---------------------|-------|

---

DAPT, dual antiplatelet therapy; TOAST, Trial of Org 10172 in Acute Stroke Treatment; LAA, large-artery atherosclerosis; SVO, small-vessel occlusion; Other etiologies, including cardioembolism, stroke of other determined etiology and stroke of undetermined etiology.
