# Supplementary material for: Argatroban in Patients With Acute Ischemic Stroke With Early Neurological Deterioration: A Randomized Clinical Trial
Source: PubMed Central journal article supplement (PMC10775075; doi:10.1001/jamaneurol.2023.5093), 2024-01-08
Supplement: jamaneurol-e235093-s004.pdf [file jamaneurol-e235093-s004.pdf]

## Data Sharing Statement

Zhang. Argatroban in Patients With Acute Ischemic Stroke With Early Neurological Deterioration. *JAMA Neurol*. Published January 08, 2024. doi:10.1001/jamaneurol.2023.5093

### Data

**Data available:** No
